**Article Type: Letter**

**Energy demand and the context-dependent effects of genetic interactions**

Luke A. Hoekstra<sup>1</sup>, Cole R. Julick<sup>2</sup>, Katelyn M. Mika<sup>3</sup>, and Kristi L. Montooth<sup>2\*</sup>

**Affiliations**

<sup>1</sup> Department of Evolution, Ecology and Organismal Biology, Iowa State University,  
lhoek@iastate.edu

<sup>2</sup> School of Biological Sciences, University of Nebraska-Lincoln, cjulick2@unl.edu

<sup>3</sup> Department of Human Genetics, University of Chicago, kmmika@uchicago.edu

\* Corresponding author: School of Biological Sciences, University of Nebraska-Lincoln,  
Lincoln, NE 68588-0118, Email: kmontooth2@unl.edu

**Running head:** Genetic effects vary with energetic demand

**Keywords:** *Drosophila melanogaster*, energetics, epistasis, gene-environment interaction, life-history tradeoffs, metabolic rate, mtDNA, phenotypic plasticity

**Data archival location:** Data to be deposited in Dryad

**Abstract word count:** 170

**Main text word count:** 4954

**Figures:** 3 main and 2 supplemental

**Tables:** 1 main and 8 supplemental

## ABSTRACT

Genetic effects are often context dependent, with the same genotype differentially affecting phenotypes across environments, life stages, and sexes. We used an environmental manipulation  
5 designed to increase energy demand during development to investigate energy demand as a general physiological explanation for context-dependent effects of mutations, particularly for those mutations that affect metabolism. We found that increasing the photoperiod during which  
*Drosophila* larvae are active during development phenocopies a temperature-dependent developmental delay in a mitochondrial-nuclear genotype with disrupted metabolism. This result  
10 indicates that the context-dependent fitness effects of this genotype are not specific to the effects of temperature and may generally result from variation in energy demand. The effects of this genotype also differ across life stages and between the sexes. The mitochondrial-nuclear genetic interaction disrupts metabolic rate in growing larvae, but not in adults, and compromises female,  
but not male, reproductive fitness. These patterns are consistent with a model where context-  
15 dependent genotype-phenotype relationships may generally arise from differences in energy demand experienced by individuals across environments, life stages, and sexes.

## IMPACT SUMMARY

Genetic effects on traits are often context dependent, such that a genotype that improves fitness  
20 under one context may have no effect or even a deleterious effect in another context. The  
external environment is a common context that affects the degree to which a genotype  
determines a phenotype, but the internal environment of an organism (e.g., its genetic  
background, sex or life stage) also provides an important context that may modify the phenotypic  
expression of a genotype. Here we combine new data on the phenotypic effects of a well-  
25 characterized genetic interaction between the mitochondrial and nuclear genomes of the fruit fly  
*Drosophila* with prior observations to support a model of energy demand as a general  
explanation for context-dependent genetic effects, particularly for mutations that affect  
metabolism. We show that the magnitude of fitness effects of this genetic interaction correlates  
positively with the degree of energy demand among developmental treatments that accelerate  
30 growth rate, across developmental stages that differ in the cost of growth, and between sexes  
with potentially different costs of reproduction. These internal and external contexts create  
variable demands on energy metabolism that will impact the efficacy of natural selection acting  
on metabolic mutations in populations.

## 35 INTRODUCTION

Environment, development and physiological state can all modify the phenotypic expression of genetic variation (e.g. Hartman *et al.* 2001; Raj *et al.* 2010). Because natural selection acts upon the subset of expressed genetic variation that affects fitness, the fate of new mutations may depend on the landscape of genetic backgrounds and environments experienced by a population  
40 (e.g. Remold and Lenski 2004, Chandler *et al.* 2013, Lachance *et al.* 2013, Wang *et al.* 2013, Kammenga *et al.* 2017). Routine variation in the internal – genetic, developmental, physiological – or external environment can challenge the capacity of individuals to maintain homeostasis, and this can magnify deleterious mutational effects (e.g. Kondrashov and Houle 1994, Hoekstra *et al.* 2013). Conversely, favorable environments can mask potential genotype-phenotype relationships  
45 (Harshman and Zera 2007, Agrawal *et al.* 2010, Hoekstra *et al.* 2013). If the relationship between genotype and fitness is generally conditional on internal or external environmental factors (i.e., is context dependent), then elucidating general principles underlying genotype-phenotype-environment interactions is critical for understanding evolutionary processes such as the maintenance of genetic variation for life-history traits (Roff and Fairbairn 2007, Van Dyken  
50 and Wade 2010, Mackay 2013).

If context-dependent genetic effects mediate phenotypic tradeoffs – often manifest as negative phenotypic trait correlations – then dissecting the underlying physiology can provide mechanistic explanations of phenotypic correlations that better enable predictions regarding the performance of particular genotypes in particular environments (Harshman and Zera 2007, Flatt  
55 and Heyland 2011). Many phenotypic tradeoffs likely result from the differential allocation of finite resources to growth, survival, and reproduction (Van Noordwijk and Dejong 1986, Roff 2002). Traits such as growth rate and gamete production demand sufficient energy production

supplied by metabolic processes, but the rate of metabolism itself is subject to homeostatic regulation that can influence energy allocation and obscure trait correlations (Clarke and Fraser  
60 2004, Harshmann and Zera 2007, Leopold and Perrimon 2007). While many good examples of the importance of environmental context for tradeoffs exist (reviewed in Asplen *et al.* 2012), understanding the genetic architecture underlying tradeoffs and the physiological mechanisms mediating them lags behind (Roff and Fairbairn 2007).

To begin to fill this gap in our understanding, we combined well-characterized  
65 mitochondrial-nuclear (hereinafter mito-nuclear) genotypes that affect metabolism, physiology and fitness in *Drosophilid* flies (Hoekstra *et al.* 2013, Meiklejohn *et al.* 2013, Holmbeck *et al.* 2015, Zhang *et al.* 2017) with an environmental perturbation designed to manipulate energy demand. Phenotypic effects of variation in the mitochondrial genome (mtDNA) often depend upon variation in the nuclear genome due to the functional interactions between gene products  
70 from these two genomes (reviewed in Burton and Barreto 2012). In ectotherms, the phenotypic effects of these mito-nuclear genetic interactions frequently depend upon temperature (Dowling *et al.* 2007a; Arnqvist *et al.* 2010; Hoekstra *et al.* 2013; Paliwal *et al.* 2014). For example, cool development temperatures masked the deleterious effects of a mito-nuclear incompatibility in *Drosophila*, while warmer temperatures generated inefficiencies in larval metabolism that  
75 magnified the deleterious effects of the incompatibility on development rate (Hoekstra *et al.* 2013). We proposed that this was due to the accelerating effect of temperature in speeding up development and increasing demand on energetic processes during more rapid larval growth. Here we show that manipulating the developmental photoperiod to accelerate growth and putatively increase energy demand (Kyriacou *et al.* 1990, Paranjpe *et al.* 2005) generates similar  
80 context-dependent effects of this genotype on development that are independent of temperature.

This suggests that energy demand may be a general physiological explanation for why some environments expose, while others mask, genetic effects.

Energy demand may also provide a general explanation for why genetic effects vary across life stages and between sexes. The substantial metabolic cost of growth (Parry 1983, 85 Glazier 2005) may cause the energy budget of developing organisms to be more constrained than that of adults. This may be particularly true for holometabolous insects that experience exponential growth during development before reaching a relatively static adult size (Church and Robertson, 1966). After the cessation of growth, adults of different sexes may partition energy in different ways due to the differential costs of reproduction (Bateman 1984; Hayward and 90 Gillooly 2011), potentially generating sex-specific effects of mutations. Here we present patterns of context-dependent effects of a mito-nuclear incompatibility that are consistent with a model where internal and external environments that cause energy demand to exceed supply may generally expose mutational effects on phenotypes. This has important consequences for the efficacy of natural selection acting on mutations in populations, and particularly for those 95 mutations that impact metabolism.

## METHODS

### *Drosophila* genotypes

We used mito-nuclear genotypes that precisely pair mtDNAs from *Drosophila melanogaster* and 100 *D. simulans* with nuclear genomes from wild-type *D. melanogaster* (Montooth *et al.* 2010). Pairing the *D. simulans* mtDNA from the *simw*<sup>501</sup> strain with two *D. melanogaster* nuclear genomes reveals a strong mito-nuclear epistatic interaction for fitness. The *D. simulans simw*<sup>501</sup> mtDNA is phenotypically wild type when combined with the *D. melanogaster AutW132* nuclear

genome (hereinafter *Aut*), but is incompatible with the *D. melanogaster Oregon-R* (hereinafter  
105 *OreR*) nuclear genome, resulting in a significant increase in development time and decrease in  
fitness of the (*simw*<sup>501</sup>);*OreR* (mtDNA);nuclear genotype (Montooth *et al.* 2010, Meiklejohn *et al.* 2013). The molecular genetic basis of this interaction is an incompatible pairing between a  
single nucleotide polymorphism (SNP) in the *simw*<sup>501</sup> mitochondrial-encoded tRNA<sup>Tyr</sup> and a  
naturally segregating amino acid polymorphism present in the *OreR* nuclear-encoded  
110 mitochondrial tyrosyl-tRNA synthetase gene, *Aatm*. These mutations act epistatically to decrease  
OXPHOS activity, as predicted by the critical role that these genes play in mitochondrial protein  
translation (Meiklejohn *et al.* 2013). The four genotypes that we use here – (*ore*);*Aut*,  
(*ore*);*OreR*, (*simw*<sup>501</sup>);*Aut*, and (*simw*<sup>501</sup>);*OreR* – provide a well-characterized model of epistasis  
between naturally occurring polymorphisms that affects energy metabolism and fitness, allowing  
115 us to test how internal and external environment influences the phenotypic expression of genetic  
interactions (Table 1). Fly cultures were maintained on Bloomington *Drosophila* Stock Center  
media with a 12:12h light:dark cycle, unless otherwise indicated.

### *Manipulating developmental photoperiod*

120 We tested the specific prediction that an arrhythmic photoperiod (24:0h L:D) would accelerate  
growth rate in wild-type genotypes, but that the increased energy demand of accelerated growth  
would induce a developmental delay of the incompatible (*simw*<sup>501</sup>);*OreR* genotype at 16°C – a  
temperature where this genotype has a wild-type development time (Hoekstra *et al.* 2013). We  
also tested whether arrhythmic photoperiods at 22°C would phenocopy the developmental delay  
125 caused by (*simw*<sup>501</sup>);*OreR* at higher developmental temperatures (Hoekstra *et al.* 2013). We  
quantified the effect of extended day length on development time using four different

combinations of temperature and light:dark cycle (16°C, 12:12h; 16°C, 24:0h; 22°C, 12:12h; 22°C, 24:0h). For each genotype, replicate pools of fifty 0-12 hour old eggs were collected into fresh food vials and randomly assigned to one of the four developmental treatments. We scored  
130 the number of new pupae and new adults to eclose once per day at 16°C and twice per day at 22°C for approximately 20 vials of each genotype under each developmental treatment. The fixed effects of genotype and photoperiod on development time within each temperature were tested using mixed-model analysis of variance (ANOVA) models that were fit using restricted maximum likelihood and included rearing vial as a random factor. All analyses were performed  
135 in the R statistical package (R Core Team 2013).

#### *Adult mass and metabolic rate*

Incompatible (*simw*<sup>501</sup>);*OreR* larvae have inefficient larval metabolism, manifest as higher metabolic rates and longer development times at 25°C, but develop and respire at a normal pace  
140 at 16°C (Hoekstra *et al.* 2013). To test whether this mito-nuclear incompatibility also affects adult metabolism, we reared all four genotypes from egg to adult with controlled densities at 16°C or 25°C and measured mass and metabolic rate of 3-6 day old adults. At 48 hrs. post-pupal eclosion, adult flies were lightly anaesthetized with CO<sub>2</sub>, sexed, and sorted into groups of ten flies. The wet mass of each group of ten flies was recorded to the nearest µg and adults were  
145 allowed to recover in fresh, yeasted food vials for at least 24hrs. Mass was log-transformed to improve normality and genetic effects on mass were tested using ANOVA and Tukey's post-hoc contrasts corrected for the number of multiple tests.

We used flow-through respirometry to estimate routine metabolic rate (hereinafter, metabolic rate) as the volume of CO<sub>2</sub> (VCO<sub>2</sub>) produced by groups of ten female or male flies of



150 the same genotype that were confined to a small, dark space to minimize activity.  $VCO_2$  is a  
good proxy for metabolic rate in insects like *D. melanogaster* that largely use carbohydrates for  
respiration and have a respiratory quotient of approximately one (Chadwick 1947). We measured  
at least ten biological replicates of each combination of genotype, sex, development temperature  
( $T_{DEV} = 16^\circ C$  and  $25^\circ C$ ), and measurement temperature ( $T_{MEASURE} = 16^\circ C$  and  $25^\circ C$ ) using  
155 offspring collected from multiple cultures and multiple parental generations in order to average  
across micro-environmental effects. Metabolic rates were measured between 11:00 am and 7:00  
pm, and genotypes were distributed across this timeframe and across respirometry chambers  
using a random, balanced design. All measurements were made in a Peltier-controlled thermal  
cabinet (Tritech Research, Inc.), and measurement temperature was monitored using a  
160 thermocouple meter wired into an empty respirometry chamber.

For flow-through measurement of adult  $VCO_2$  we pushed  $CO_2$ -free air through glass  
respirometry chambers containing flies at a rate of  $100 \text{ ml min}^{-1}$ . Air that leaves the chamber  
carries  $CO_2$  produced by the flies, as well as water. The water vapor was removed from the  
airstream using magnesium perchlorate, and the  $CO_2$  in the airstream was measured using a  
165 Licor 7000 infrared  $CO_2$  detector (Licor, Lincoln, NE, USA). We used the RM8 Intelligent  
Multiplexer to switch the airstream sequentially through five respiratory chambers (Sable  
Systems International, Las Vegas, NV, USA), one of which serves as an empty baseline  
chamber. Each experimental run measured the  $VCO_2$  of four pools of ten adult flies, each  
sampled twice for ten minutes during a 100-minute period. There is no death from this treatment.

170 Baseline  $CO_2$  values were recorded before and after each sample and used to drift-correct  
 $CO_2$ -tracings using the two-endpoint automatic method in Expedata, version 1.1.15 (Sable  
Systems International, Las Vegas NV). Raw  $CO_2$  values were converted from parts per million to

$\mu\text{L hr}^{-1}$  ( $\text{VCO}_2$ ) and then log-transformed to improve normality and homoscedasticity. To allow metabolic rate to acclimate in response to temperature shifts (e.g.,  $T_{\text{DEV}} = 16^\circ\text{C}$  and  $T_{\text{MEASURE}} =$   
175  $25^\circ\text{C}$ ), we used the second recording of each respirometry run to estimate metabolic rate such that flies were acclimated for 50-80min.

Because there is measurement error in adult body mass, we estimated the scaling relationship between mass and  $\text{VCO}_2$  using Type II Model regression implemented with smatR, version 3.4.3 (Warton *et al.* 2006). When justified by a homogeneity of slopes test for the log-log  
180 relationship between mass and  $\text{VCO}_2$ , we fit a common slope to all genotypes and tested for shifts along the common x axis (i.e., differences in mass) and for shifts in elevation (i.e., differences in mass-specific metabolic rate) among genotypes. Across genotypes within each of the four  $T_{\text{MEASURE}} \times \text{Sex}$  combinations, we were able to fit a common slope and test for genotype differences in mass and in mass-specific metabolic rate. We could then correct for the effect of  
185 mass on metabolic rate by taking the residuals of each of these regressions and adding back the grand mean of all fitted values to provide meaningful scale. We refer to these values as mass-corrected metabolic rates (MCMR). We tested for the fixed effects of  $T_{\text{DEV}}$ , mtDNA, nuclear genotype, and all possible interactions on MCMR using analysis of variance (ANOVA).

Respirometry chambers were housed inside infrared activity detectors (AD-2, Sable  
190 Systems International, Las Vegas NV), providing a simultaneous measurement of activity. We summarized the activity data by taking the median absolute difference of activity across each seven-minute metabolic rate measurement. This measure of activity neither significantly affected metabolic rate nor interacted with any genetic effects and was not included in our final statistical models.

195

### *Adult reproductive traits*

Incompatible (*simw*<sup>501</sup>);*OreR* females have significantly reduced fecundity, measured as the number of eggs laid over 10 days (Meiklejohn *et al.* 2013). To test whether males of this genotype also suffer a decrease in reproductive fitness, we measured one aspect of male fertility – the number of offspring sired by an individual male mated to virgin females of a control wild-type genotype, *Canton-S*. Thirty males were assayed for fertility across two experimental blocks that spanned multiple parental generations and used slightly different female genotypes. Both female genotypes were *Canton-S*, but in the first block the strain carried the *cn,bw* eye mutation. Block was included as a fixed factor in the analysis. However, rank orders of genotypes for the number of females fertilized and the number of offspring sired were similar between blocks.

Males were given 48-hours to mate with three virgin females. After 48-hours, we placed each female into a separate vial to lay fertilized eggs for an additional week. Progeny emerging from each vial were counted every other day until all progeny were counted. Males that sired fewer than 25 offspring were removed from the analysis, which resulted in a sample size of 29 males per genotype, except for (*simw*<sup>501</sup>);*Aut* for which  $n = 28$  males. By placing females in separate vials after they were housed with the focal male, we could infer how many females were mated by each male, with the caveat that some females may have laid eggs in the first vial, but not in their individual vials. The median number of females that produced offspring in their vial per male was 3 (mean = 2.64) and this was not affected by genotype ( $P > 0.15$  for genotype and all interactions). We estimated fertility as the total progeny sired by each male divided by the number of females with whom that male produced progeny. We tested for fixed effects of mtDNA, nuclear genotype, experimental block and the interaction between these factors using ANOVA.

## 220 RESULTS

*An arrhythmic photoperiod phenocopies the temperature-dependent developmental delay of a mito-nuclear incompatibility*

The developmental delay of incompatible (*simw*<sup>501</sup>);*OreR* larvae is strongly mediated by temperature, with warmer temperatures exacerbating and cooler temperatures masking the delay (Hoekstra *et al.* 2013). *Drosophila* development rate depends on variation in the rhythmicity of the photoperiod (e.g. Kyriacou *et al.* 1990, Paranjpe *et al.* 2005). We tested whether an arrhythmic, continuous-light photoperiod (24:0h L:D) that typically accelerates larval-to-adult development (Paranjpe *et al.* 2005) could phenocopy this developmental delay in a manner similar to the accelerating effect of increased temperature. The accelerating effect of arrhythmic photoperiod influenced the severity of the (*simw*<sup>501</sup>);*OreR* developmental delay in a pattern remarkably similar to the effect of increased development temperature (Figure 1, Supplemental Tables S1 & S2). The incompatible (*simw*<sup>501</sup>);*OreR* genotype developed at the same pace as other genotypes when reared at 16°C with a fluctuating photoperiod (12:12h L:D) (mtDNA x Nuclear:  $F_{1, 80} = 0.38$ ,  $P = 0.5413$ ). However, the incompatible (*simw*<sup>501</sup>);*OreR* genotype experienced a significant developmental delay relative to other genotypes when developed at 16°C with constant light (24:0h L:D) (mtDNA x Nuclear:  $F_{1, 79} = 30.13$ ,  $P < 0.0001$ ). At 22°C, where the incompatible genotype normally experiences a significant developmental delay with a fluctuating photoperiod, the constant light photoperiod magnified the developmental delay (Photoperiod x mtDNA x Nuclear:  $F_{1, 153} = 299.07$ ,  $P < 0.0001$ ). This was a particularly striking effect; constant light accelerated development of compatible mito-nuclear genotypes by ~ 2 days at 22°C, which is comparable to development time at 25°C. In contrast, constant light at 22°C

significantly slowed development of the incompatible (*simw*<sup>501</sup>);*OreR* genotype, resulting in an ~4-day developmental delay between (*simw*<sup>501</sup>);*OreR* and compatible genotypes (Figure 1).

245 Within each developmental temperature, the magnitude of the effect of the mito-nuclear genetic interaction on development time was conditional on photoperiod (G x G x E, Table 1;  $P < 0.0001$  for both developmental temperatures, Supplemental Table S1). However, there was no evidence that the highest-order interaction between development temperature, photoperiod, mtDNA and nuclear genotype affected development time (G x G x E x E, Table 1;  $F_{1,312} = 0.41$ ,  $P = 0.5244$ ). In other words, the effects of development temperature and photoperiod to delay development  
250 specifically in the incompatible genotype were independent.

*Adults with a mito-nuclear incompatibility achieve similar masses as compatible genotypes*

Gene-environment (G x E) effects on adult mass were dominated by interactions between nuclear genotype and the known effects of both development temperature and sex on mass  
255 (Supplemental Table S3). Relative to these large effects, there was a small, but statistically significant effect of the mito-nuclear interaction on mass (mtDNA x nuclear:  $F_{1,317} = 6.078$ ,  $P = 0.0142$ ). Rather than eclosing as smaller adults, (*simw*<sup>501</sup>);*OreR* adults were slightly larger than (*ore*);*OreR* adults ( $P_{Tukey} = 0.04$ ). However, the magnitude of the effect was small (+ 0.04 mg/10 flies) and the mtDNA x nuclear interaction was only statistically significant for females raised at  
260 16°C (Supplemental Table S4). This small but consistent effect may be caused by smaller (*simw*<sup>501</sup>);*OreR* larvae not surviving development as well as smaller individuals of other genotypes, as this genotype has reduced egg-to-pupal survival (Hoekstra *et al.* 2013). In summary, adults with a mito-nuclear incompatibility that survive development achieve body

masses that are similar to or greater than compatible genotypes, potentially as a consequence of  
265 their extended time spent as feeding larvae.

*In contrast to larvae, adult metabolic rate is more robust to mito-nuclear interactions*

The scaling of metabolic rate as a function of mass can be characterized by the slope of the  
relationship between  $\ln(\text{metabolic rate})$  and  $\ln(\text{mass})$  (i.e., the mass-scaling exponent). The mass-  
270 scaling exponent differed slightly, but significantly between sexes and between measurement  
temperatures for adults in this study ( $P < 0.0001$  for both Sex x Mass and  $T_{\text{MEASURE}} \times \text{Mass}$   
interactions). However, within each combination of sex and  $T_{\text{MEASURE}}$ , there was no evidence  
that genotype or development temperature affected the mass-scaling exponent ( $P > 0.05$  for  
both). Thus, we fit common slopes to the metabolic rate data for all genotypes within sex-  
275  $T_{\text{MEASURE}}$  combination to test for effects of mito-nuclear genotype (Supplemental Figure S1 and  
Table S5). Within each sex- $T_{\text{MEASURE}}$  combination, the range of masses for all genotypes were  
largely overlapping and there was no evidence for differences in mass among genotypes  
(Supplemental Figure S1 and Table S5).

In contrast to the larval life stage where (*simw*<sup>501</sup>);*OreR* larvae have significantly elevated  
280 25°C metabolic rates (Hoekstra et al. 2013), there was no evidence of elevated metabolic rate in  
the incompatible (*simw*<sup>501</sup>);*OreR* adults measured at any temperature. The only significant effect  
of the mito-nuclear genotype on adult metabolic rate was a lower (*simw*<sup>501</sup>);*OreR* metabolic rate  
relative to compatible genotypes at 16°C. However, once again, this effect was small and only in  
females (Figure 2A, Supplemental Figure S1 and Table S5). Male metabolic rate was unaffected  
285 by mito-nuclear genotype (Supplemental Figure S1 and Table S5). Significant effects of the  
nuclear genome at 25°C (Supplemental Table S5) and in our prior work (Hoekstra & Montooth

2013, Hoekstra et al. 2013, Greenlee *et al.* 2014) demonstrate the sensitivity of this method to detect both genetic and environmental effects on metabolic rate.

Mass-corrected metabolic rates allow for comparisons of genotypes across development  
290 and measurement temperatures (i.e., metabolic plasticity) (Figure 2B-D, Supplemental Figure  
S2, Supplemental Tables S6 & S7). This analysis revealed that the lower 16°C metabolic rates in  
(*simw*<sup>501</sup>);*OreR* females were largely the consequence of lower metabolic rates of females  
developed at 25°C and measured at 16°C. However, this difference was not statistically  
significant and supports generally weak effects of this genetic interaction on adult, relative to  
295 larval, metabolic rates. There was no evidence that the mito-nuclear interaction affected adult  
male MCMR within any combination of development or measurement temperatures  
(Supplemental Fig S2 and Table S6). In contrast to larvae, where (*simw*<sup>501</sup>);*OreR* have  
compromised thermal plasticity of metabolic rate (i.e., the  $Q_{10}$  for metabolic rate), we found no  
evidence that adults of this genotype differ in their  $Q_{10}$  for metabolic rate ( $T_{\text{MEASURE}} \times \text{mtDNA} \times$   
300 nuclear,  $P > 0.65$  for both sexes) and this was independent of development temperature  
( $T_{\text{MEASURE}} \times T_{\text{DEV}} \times \text{mtDNA} \times \text{nuclear}$ ,  $P > 0.50$  for both sexes)(Supplemental Table S7). Thus,  
relative to larvae, both adult metabolic rate and metabolic plasticity are more robust to the effects  
of this mito-nuclear genetic incompatibility.

### 305 *Mito-nuclear effects on reproductive fitness are stronger in females*

Patterns of male fertility and female fecundity provide further evidence that the effects of the  
mito-nuclear incompatibility are sex specific. The mito-nuclear interaction did not compromise  
the number of offspring sired by males (mtDNA  $\times$  nuclear:  $F_{1, 107} = 0.185$ ,  $P = 0.668$ )(Figure 3A,  
Supplemental Table S8). This is in contrast to strong mito-nuclear effects on female fecundity,

310 with females of the (*simw*<sup>501</sup>);*OreR* genotype producing ~50% fewer eggs than (*ore*);*OreR*  
females (Figure 3B, Supplemental Table S8)(Meiklejohn *et al.* 2013). Thus, while both sexes  
generally maintain metabolic rate independent of mito-nuclear genotype, (*simw*<sup>501</sup>);*OreR* females  
appear to do so at the cost of egg production.

## 315 **DISCUSSION**

Previously, we found that a synergistic, epistatic interaction between polymorphisms in the mt-  
tRNA<sup>Tyr</sup> and the nuclear-encoded, mitochondrially targeted tRNA-synthetase for this mt-tRNA  
decreases OXPHOS activity and negatively impacts a number of life-history traits in a  
temperature-dependent manner in *Drosophila* (Montooth *et al.* 2010, Meiklejohn *et al.* 2013,  
320 Hoekstra *et al.* 2013, Zhang *et al.* 2017). Here we show that the phenotypic expression of this  
genetic interaction is generally environment-dependent and depends on intrinsic factors such as  
life stage and sex in a manner consistent with greater energy demands revealing fitness effects of  
mutations that compromise metabolism.

### 325 *The physiological basis of environment-dependent, mito-nuclear effects*

Many organismal traits, particularly in ectotherms, are temperature dependent, including the  
universal, but mechanistically not well understood, unimodal thermal performance curve for  
metabolic rate (Angilletta 2009, Schulte 2015, DeLong *et al.* 2017). Given this relationship  
between temperature and metabolic processes, the thermal environment is likely an ecologically  
330 relevant and critical determinant of the relationship between genotype and phenotype for traits  
that depend on metabolic function. Phenotypic effects of cytonuclear interactions, including the  
mito-nuclear incompatibility described here, can be temperature sensitive (Arnqvist *et al.* 2010,



Dowling *et al.* 2007a, Hoekstra *et al.* 2013). The temperature dependence of these mito-nuclear genetic effects could result from direct thermodynamic effects on the physical interaction  
335 between the mutations, e.g., between mutations in the mt-tRNA<sup>Tyr</sup> and its tRNA synthetase. Alternatively, the temperature dependence may arise indirectly, as metabolic rate and development rate increase with temperature and place greater demand on the energetic products of mito-nuclear interactions. This latter, energy-dependent explanation is also consistent with the observations that mitochondrial genetic effects can be temperature sensitive (Pichaud *et al.* 2013)  
340 and both mitochondrial and mito-nuclear effects can be diet sensitive (Zhu *et al.* 2014, Ballard and Youngson 2015, Mossman *et al.* 2016). Here we found that manipulating the photoperiod to accelerate growth rate independent of temperature produced patterns of context-dependent mito-nuclear genetic effects strikingly similar to those revealed by varying development temperature. While this does not exclude the possibility that there are direct thermal effects on the physical  
345 interaction between mt-tRNA and tRNA synthetase, it demonstrates that temperature is not required to expose this genetic interaction and suggests a more general physiological explanation – external and internal contexts that place greater demand on energy metabolism expose deleterious effects of genetic interactions that compromise energy supply.

In some insects, including *Drosophila*, pupal eclosion behavior is under control of the  
350 circadian clock (Kyriacou *et al.* 1990, Paranjpe *et al.* 2005). Under cyclic or rhythmic photoperiodic regimes, the circadian clock entrains to the light cycle and eclosion behavior is gated such that pupae will delay the initiation of eclosion behavior until lights off in order to synchronize eclosion with dawn. In arrhythmic photoperiodic environments, however, eclosion behavior is unregulated and pupae initiate eclosion behavior as quickly as possible. While  
355 compatible mito-nuclear genotypes developed under arrhythmic photoperiods experienced an

unregulated acceleration of development, incompatible mito-nuclear genotypes do not appear to have the energetic capacity to similarly accelerate growth. (*simw*<sup>501</sup>); *OreR* larvae also have significantly reduced thermal plasticity for metabolic rate (i.e., they have a very low  $Q_{10}$ ) (Hoekstra *et al.* 2013). Thus under two independent contexts that normally accelerate growth  
360 (arrhythmic photoperiod and warm temperatures), this mito-nuclear incompatibility appears to limit larval growth. Mito-nuclear incompatibilities likely limit the scope for growth, potentially because incompatibilities compromise ATP production and result in energy supplies that are very close to demand.

### 365 *Ontogeny of the energy budget*

Even at temperatures that most exacerbate mito-nuclear effects on larval metabolic rate and survivorship (Hoekstra *et al.* 2013), we found that the effects of this mito-nuclear incompatibility on adult metabolic rate are minimal. This suggests that the deleterious effects of mito-nuclear incompatibility on metabolic rate and survivorship may be alleviated by the cessation of growth.  
370 Larval growth in *D. melanogaster* proceeds extremely quickly and challenges metabolic processes (Church and Robertson 1966, Tennessen *et al.* 2011). Furthermore, metabolism during growth is estimated to be 40% to 79% above that of fully developed conspecifics (Parry 1983), and cessation of growth in holometabolous insects is correlated with an ontogenetic decrease in metabolic rate per unit mass (Glazier 2005, Callier and Nijhout 2012, Greenlee *et al.* 2014,  
375 Maino and Kearney 2014). Thus, the cessation of growth in *Drosophila* likely results in the excess metabolic capacity needed to compensate adult metabolic rate of incompatible, mito-nuclear genotypes. Hoekstra *et al.* (2013) also observed that for those individuals that survive to pupation, there is no further effect of the mito-nuclear incompatibility on survival through

metamorphosis, when metabolic rates decrease to a minimum (Dobzhansky & Poulson 1935,  
380 Merkey *et al.* 2011) and those individuals that have committed to pupation appear to have the  
energy stores needed for successful metamorphosis. Consistent with this, we observed that adult  
(*simw<sup>501</sup>*);*OreR* attain similar mass at eclosion as do adults with compatible mitochondrial and  
nuclear genomes. Changes in the energy budget of holometabolous insects across development  
(e.g., Merkey *et al.* 2011) likely generate important ontogenetic contingency for the fitness  
385 effects of mutations in populations. The fate of conditionally neutral alleles, such as those  
underlying this mito-nuclear incompatibility, will then depend not only on what environments  
are experienced, but when those environments are experienced in an organism's lifespan (*sensu*  
Diggle, 1994).

#### 390 *Sex-specific costs of reproduction*

The small effect that this mito-nuclear interaction did have on adult metabolic rate was sex  
specific. (*simw<sup>501</sup>*);*OreR* females had significantly depressed metabolic rates when measured at  
cool temperatures. There was some indication that this was driven by disruption of metabolic  
plasticity, similar to what we have observed in larvae of this genotype, although of much weaker  
395 effect; (*simw<sup>501</sup>*);*OreR* females developed at one temperature and measured at the other  
temperature had the lowest mass-corrected metabolic rates relative to all other compatible  
genotypes.

If energy stores in mito-nuclear incompatible individuals are limited, then the  
maintenance of metabolic rate using an inefficient OXPHOS system might support adult, but at a  
400 cost to more energetically demanding function, such as reproduction. We observed this pattern in  
females, but not in males. Females with incompatible mito-nuclear genomes laid far fewer eggs,

while the fertility of males with the same mito-nuclear combination was unaffected. The fecundity defects in (*simw*<sup>501</sup>);*OreR* females are also strongly temperature dependent and involve defects in the development and maintenance of the ovary (Zhang *et al.* 2017). Furthermore, 405 mothers of this genotype developed at 28°C produce defective eggs that have a lower probability of being fertilized and, when fertilized, die during embryogenesis presumably due to insufficient maternal provisioning or the inheritance of sub-functional mitochondria (Zhang *et al.* 2017).

Although we measured only one aspect of reproductive fitness for each sex, this pattern is consistent with a higher cost of reproduction in females (Bateman 1948) and with empirical 410 estimates of the costs of gamete production that suggest that high costs of egg production may specifically constrain female gamete production (Hayward and Gillooly 2011). Oogenesis in *Drosophila* is regulated in response to nutrient availability (Drummond-Barbosa & Spradling 2001), but nutrient checkpoints for spermatogenesis are less well studied (but see e.g., McLeod *et al.* 2010, Yang & Yamashita 2015). Further experiments are warranted to determine whether 415 there are more subtle fertility defects in (*simw*<sup>501</sup>);*OreR* males, as cytoplasmic effects on sperm morphology and viability have been measured in seed beetles (Dowling *et al.* 2007b). However, these viability differences do not contribute to cytoplasmic effects on sperm competition in seed beetles or in *D. melanogaster* (Dowling *et al.* 2007c, Friberg & Dowling 2008). Our findings suggest that homeostasis for metabolic rate (or ATP production) combined with potentially 420 differential costs of gametogenesis, may generate sex-specific allocation tradeoffs between maintenance and reproduction as a consequence of genetic variation in metabolic processes.

## Conclusion

Our observation that the degree of expression of a mito-nuclear incompatibility correlates

425 with energetic demand – among developmental treatments that accelerate growth rate, across  
developmental stages with substantial differences in the cost of growth, and between sexes with  
putatively different costs of reproduction – suggests that the phenotypic effects of genetic  
interactions that impact metabolism will depend broadly on the context of energy use and the  
metabolic cost of producing focal traits. These energetic contexts may change as a function of  
430 the external (e.g. temperature or photoperiod) or internal (e.g., life stage, sex or tissue)  
environment in which a trait is expressed. The context-dependent genotype-phenotype  
relationships that we describe exemplify how energy allocation principles and design constraints  
can generate complicated environment-dependence, potentially confounding attempts to define  
fitness in energetic terms (e.g., Bruning *et al.* 2013). Yet, many components of fitness are  
435 expected to depend on the pathways of metabolism, and the variable phenotypic expression of  
mutations in these pathways presents a dynamic and perhaps challenging context for both  
purifying and adaptive selection, as context-dependent mutational effects only experience  
selection in a fraction of possible environments (Van Dyken and Wade 2010). This weakening of  
selection may be an important contribution to the maintenance of genetic variation for  
440 metabolism and life-history traits in populations.

## **ACKNOWLEDGEMENTS**

445 The authors thank members of the K. Montooth, C. Meiklejohn and J. Storz labs for feedback on  
this manuscript, and acknowledge funding support from NSF IOS Award 1149178 to KLM.

## **AUTHOR CONTRIBUTIONS**

LAH and KLM conceived and designed the study, LAH, CRJ, KMM and KLM collected and  
450 analyzed the data, LAH and KLM drafted the initial version of the manuscript, and all authors  
contributed to later versions of the manuscript.

## **DATA ACCESSIBILITY**

All data will be available in Dryad upon publication of the manuscript.

455 **REFERENCES**

- Agrawal, A.A., Conner, J.K. & Rasmann, S. (2010) Tradeoffs and adaptive negative correlations in evolutionary ecology. In: *Evolution After Darwin: the First 150 Years* ed(s) Bell, M., Eanes, W., Futuyma, D. & Levinton, J. Sinauer, Sunderland, Massachusetts.
- 460 Angilletta, M. Jr. (2009). Thermal Adaptation: A Theoretical and Empirical Synthesis. Oxford University Press, Oxford, UK
- Arnqvist, G., Dowling, D.K., Eady, P., Gay, L., Tregenza, T., Tuda, M. *et al.* (2010). Genetic Architecture of metabolic rate: environment specific epistasis between mitochondrial and nuclear genes in an insect. *Evolution* 64:3354-3363.
- 465 Asplen, M.K., Bruns, E., David, A.S., Denison, R.F., Epstein, B., Kaiser, M.C. *et al.* (2012). Do trade-offs have explanatory power for the evolution of organismal interactions? *Evolution* 66:1297-1307.
- Ballard, J.W.O., & Youngson, N.A. (2015). Review: can diet influence the selective advantage of mitochondrial DNA haplotypes? *Bioscience Reports* 35:e00277.
- 470 Bateman, A. J. (1948) Intra-sexual selection in *Drosophila*. *Heredity* 2:349-368.
- Bruning, A., Gaitán-Espitia, J.D., González, A., Bartheld, J.L. & Nespolo, R.F. (2013). Metabolism, growth, and the energetic definition of fitness: A quantitative genetic study in the land snail *Cornu aspersum*. *Physiological Biochemical Zoology* 86:538-546.
- Callier, V. & Nijhout, H.F. (2012). Supply-side constraints are insufficient to explain the ontogenetic scaling of metabolic rate in the tobacco hornworm, *Manduca sexta*. *PloS ONE* 7:e45455.
- 475 Chadwick, L.E. (1947). The respiratory quotient of *Drosophila* in flight. *Biological*

*Bulletin* 93:229-239.

480 Chandler, C.H., Chari, S. & Dworkin, I. (2013). Does your gene need a background check? How  
genetic background impacts the analysis of mutations, genes, and evolution. *Trends in  
Genetics* 29:358–366.

Church, R.B. & Robertson, F.W. (1966). A biochemical study of the growth of  
*Drosophila melanogaster*. *Journal of Experimental Zoology* 162:337-351.

485 Clarke, A. & Fraser, K.P.P. (2004). Why does metabolism scale with temperature? *Functional  
Ecology* 18:243-251.

DeLong, J.P., Gibert, J.P., Luhring, T.M., Bachman, G., Reed, B. *et al.* (2017). The combined  
effects of reactant kinetics and enzyme stability explain the temperature dependence of  
metabolic rates. *Ecol Evol* 7:3940–3950.

490 Diggle, P.K. (1994). The expression of andromonoecy in *Solanum-Hirtum* (*Solanaceae*) -  
phenotypic plasticity and ontogenic contingency. *American Journal of Botany* 81:1354-  
1365.

Dobzhansky, T. & Poulson, D.F. (1935). Oxygen consumption of *Drosophila* pupae. *Z. Vergl.  
Physiol.* 22:473–478.

495 Dowling, D.K., Abiega, K.C. & Arnqvist, G. (2007a). Temperature-specific outcomes of  
cytoplasmic-nuclear interactions on egg-to-adult development time in seed beetles.  
*Evolution* 61:194–201.

Dowling, D.K., Nowostawski, A.L. & Arnqvist, G. (2007b) Effects of cytoplasmic genes on  
sperm viability and sperm morphology in a seed beetle: implications for sperm  
competition theory? *Journal of Evolutionary Biology* 20:358–368.

500



- Dowling, D.K., Friberg, U. & Arnqvist, G. (2007c) A comparison of nuclear and cytoplasmic genetic effects on sperm competitiveness and female remating in a seed beetle. *Journal of Evolutionary Biology* 20:2113–2125.
- Drummond-Barbosa, D. & Spradling, A.C. (2001). Stem cells and their progeny respond to nutritional changes during *Drosophila* oogenesis. *Developmental Biology* 231:265–278.
- 505
- Flatt, T. & Heyland, A. (editors) (2011). Mechanisms of life history evolution: the genetics and physiology of life history traits and trade-offs. Oxford University Press, Oxford, UK.
- Friberg, U. & Dowling, D.K. (2008) No evidence of mitochondrial genetic variation for sperm competition within a population of *Drosophila melanogaster*. *Journal of Evolutionary*
- 510 *Biology* 21:1798–1807.
- Glazier, D.S. (2005) Beyond the '3/4-power law': variation in the intra- and interspecific scaling of metabolic rate in animals. *Biological Reviews* 80:611-662.
- Greenlee, K.J., Montooth, K.L. & Helm, B.R. (2014). Predicting performance and plasticity in the development of respiratory structures and metabolic systems. Integrative and
- 515 *Comparative Biology* 54:307–322.
- Harshman, L.G. & Zera, A.J. (2007). The cost of reproduction: the devil in the details. *TREE* 22:80-86.
- Hartman, J.L., Garvik, B. & Hartwell, L. (2001) Principles for the buffering of genetic variation. *Science* 291:1001-1004.
- 520 Hayward, A. & Gillooly, J.F. (2011). The cost of sex: quantifying energetic investment in gamete production by males and females. *PLoS ONE* 6:e16557.
- Hoekstra, L.A. & Montooth, K.L. (2013). Inducing extra copies of the *Hsp70* gene in *Drosophila melanogaster* increases energetic demand. *BMC Evolutionary Biology* 13:68.

- Hoekstra, L.A., Siddiq, M.A. & Montooth, K.L. (2013). Pleiotropic effects of a mitochondrial-  
525 nuclear incompatibility depend upon the accelerating effect of temperature in *Drosophila*.  
*Genetics* 195:1129-1139.
- Holmbeck, M.A., Donner, J.R., Villa-Cuesta, E. & Rand, D.M. (2015). A *Drosophila* model for  
mito-nuclear diseases generated by an incompatible interaction between tRNA and tRNA  
synthetase. *Disease Models & Mechanisms* 8:843–854.
- 530 Kammenga, J.E. (2017). The background puzzle: how identical mutations in the same gene lead  
to different disease symptoms. *FEBS J.* Early Online doi:10.1111/febs.14080
- Kondrashov, A.S. & Houle, D. (1994). Genotype-environment interactions and the estimation of  
the genomic mutation rate in *Drosophila melanogaster*. *Proc Roy Soc B* 258:221-227.
- Kyriacou, C.P., Oldroyd, M., Wood, J., Sharp, M. & Hill, M. (1990). Clock mutations alter  
535 developmental timing in *Drosophila*. *Heredity* 64:395-401.
- Lachance, J., Jung, L. & True, J.R. (2013). Genetic background and GxE interactions modulate  
the penetrance of a naturally occurring wing mutation in *Drosophila melanogaster*. *G3*  
3:1893-1901.
- Leopold, P. & Perrimon, N. (2007). *Drosophila* and the genetics of the internal milieu. *Nature*  
540 450:186-188.
- Mackay, T.F.C. (2014). Epistasis and quantitative traits: using model organisms to study gene-  
gene interactions. *Nature Reviews Genetics* 15:22-33.
- Maino, J.L. & Kearney, M.R. (2014). Ontogenetic and interspecific metabolic scaling in insects.  
*The American Naturalist* 184:695-701.
- 545 McLeod, C.J., Wang, L., Wong, C. & Jones, D.L. (2010). Stem cell dynamics in response to  
nutrient availability. *Current Biology* 2:2100–2105.

- Meiklejohn, C.D., Holmbeck, M.A., Siddiq, M.A., Abt, D.N., Rand, D. M. *et al.* (2013). An incompatibility between a mitochondrial tRNA and its nuclear-encoded tRNA synthetase compromises development and fitness in *Drosophila*. *Plos Genetics* 9:e1003238.
- 550 Merkey, A.B., Wong, C.K., Hoshizaki, D.K. & Gibbs, A.G. (2011). Energetics of metamorphosis in *Drosophila melanogaster*. *Journal of Insect Physiology* 57:1437–1445.
- Montooth, K.L., Meiklejohn, C.D., Abt, D.N. & Rand, D.M. (2010). Mitochondrial-nuclear epistasis affects fitness within species but does not contribute to fixed incompatibilities between species of *Drosophila*. *Evolution* 64: 3364-3379.
- 555 Mossman, J.A., Biancani, L.M., Zhu, C.-T. & Rand, D.M. (2016). Mitonuclear epistasis for development time and its modification by diet in *Drosophila*. *Genetics* 203:463–484.
- Paliwal, S., Fiumera, A.C. & Fiumera, H.L. (2014). Mitochondrial-nuclear epistasis contributes to phenotypic variation and coadaptation in natural isolates of *Saccharomyces cerevisiae*. *Genetics* 198:1251–1265.
- 560 Paranjpe, D.A., Anitha, D., Chandrashekar, M., Joshi, A. & Sharma, V.K. (2005). Possible role of eclosion rhythm in mediating the effects of light-dark environments on pre-adult development in *Drosophila melanogaster*. *BMC Developmental Biology* 5:5.
- Parry, G.D. (1983). The influence of the cost of growth on ectotherm metabolism. *Journal of Theoretical Biology* 101:453-477.
- 565 Pichaud, N., Ballard, J.W.O., Tanguay, R.M. & Blier, P.U. (2013) Mitochondrial haplotype divergences affect specific temperature sensitivity of mitochondrial respiration. *J Bioenerg Biomembr* 45:25–35.
- Raj, A., Rifkin, S.A., Andersen, E. & van Oudenaarden, A. (2010). Variability in gene expression underlies incomplete penetrance. *Nature* 463:913-U984.

- 570 R Development Core Team (2013). R: A language and environment for statistical computing. R  
Foundation for Statistical Computing, Vienna, Austria.
- Remold, S.K. & Lenski, R.E. (2004) Pervasive joint influence of epistasis and plasticity on  
mutational effects in *Escherichia coli*. *Nature Genetics* 36:423-426.
- Roff, D. A. (2002). Life history evolution. Sinauer, Sunderland, Massachusetts.
- 575 Roff, D.A. & D.J. Fairbairn (2007). The evolution of trade-offs: where are we? *Journal of  
Evolutionary Biology* 20:433-447.
- Schulte, P.M. (2015). The effects of temperature on aerobic metabolism: towards a mechanistic  
understanding of the responses of ectotherms to a changing environment. *Journal of  
Experimental Biology* 218:1856–1866.
- 580 Tennessen, J.M., Baker, K.D., Lam, G., Evans, J. & Thummel, C.S. (2011). The *Drosophila*  
estrogen-related receptor directs a metabolic switch that supports developmental growth.  
*Cell Metabolism* 13:139-148.
- Van Dyken, J.D. & Wade, M.J. (2010). The genetic signature of conditional expression.  
*Genetics* 184:557-570.
- 585 Van Noordwijk, A.J. & Dejong, G. (1986) Acquisition and allocation of resources - their  
influence on variation in life-history tactics. *American Naturalist* 128:137-142.
- Wang, A.D., Sharp, N.P. & Agrawal, A.F. (2013). Sensitivity of the distribution of  
mutational fitness effects to environment, genetic background, and adaptedness: a case  
study with *Drosophila*. *Evolution* 68:840–853.
- 590 Warton, D.I., Wright, I.J., Falster, D.S. & Westoby, M. (2006) Bivariate line-fitting methods for  
allometry. *Biological Reviews* 81:259-291.

- Yang, H. & Yamashita, Y.M. (2015) The regulated elimination of transit-amplifying cells preserves tissue homeostasis during protein starvation in *Drosophila* testis. *Development* 142:1756–1766.
- 595 Zhang, C., Montooth, K.L. & Calvi, B.R. (2017). Incompatibility between mitochondrial and nuclear genomes during oogenesis results in ovarian failure and embryonic lethality. *Development* 144:2490–2503.
- Zhu, C.-T., Ingelmo, P. & Rand, D.M. (2014). G×G×E for lifespan in *Drosophila*: mitochondrial, nuclear, and dietary interactions that modify longevity. *PLOS Genetics*
- 600 10:e1004354.

**Table 1.** Biological interpretation of context-dependent genetic effects in this study system

| Interaction <sup>1</sup> | Tested in this system <sup>2</sup>                                         | Biological interpretation                                                                                                                                                                     |
|--------------------------|----------------------------------------------------------------------------|-----------------------------------------------------------------------------------------------------------------------------------------------------------------------------------------------|
| G x G                    | mtDNA x Nuclear                                                            | Phenotypic effects of mtDNA variation depend upon nuclear genomic variation (i.e., epistasis)                                                                                                 |
| G x E                    | mtDNA   Nuclear x<br>Photoperiod   T <sub>DEV</sub>   T <sub>MEASURE</sub> | Phenotypic effects of variation in either genome depend upon the environment, which can also be interpreted as genetic variation for phenotypic plasticity                                    |
| G x G x E                | mtDNA x Nuclear x<br>Photoperiod   T <sub>DEV</sub>   T <sub>MEASURE</sub> | Phenotypic effects of the mitochondrial-nuclear interaction are conditional on environment (i.e., context-dependent epistasis)                                                                |
| G x E x E                | mtDNA   Nuclear x Photoperiod x T <sub>DEV</sub>                           | The differential effect of photoperiod on the development time of particular genotypes depends upon development temperature                                                                   |
|                          | mtDNA   Nuclear x T <sub>MEASURE</sub> x T <sub>DEV</sub>                  | Phenotypic effects of variation in either genome on thermal plasticity of metabolic rate (the $Q_{10}$ ) depend upon development temperature                                                  |
| G x G x E x E            | mtDNA x Nuclear x Photoperiod x T <sub>DEV</sub>                           | Phenotypic effects of the mitochondrial-nuclear interaction on development time in response to photoperiod are conditional upon development temperature                                       |
|                          | mtDNA x Nuclear x T <sub>MEASURE</sub> x T <sub>DEV</sub>                  | Phenotypic effects of the mitochondrial-nuclear interaction on thermal plasticity of metabolic rate (the $Q_{10}$ ) depend upon development temperature (as in Hoekstra <i>et al.</i> (2013)) |

605 <sup>1</sup> Phenotypic effects of any of these interactions may also differ between males and females (i.e., sex-specific effects).

<sup>2</sup> “|” denotes one or the other factor.

## Figure legends

**Figure 1.** An arrhythmic photoperiod phenocopies the effects of increasing temperature on a  
610 mito-nuclear incompatibility that extends development. An arrhythmic, constant light  
photoperiod (L:L) accelerates development in control genotypes relative to a rhythmic  
photoperiod (L:D), but delays development in the mito-nuclear incompatible genotype  
(*simw*<sup>501</sup>);*OreR* (Supplemental Table S1). For comparison, the developmental delay of  
(*simw*<sup>501</sup>);*OreR* larvae relative to control genotypes under constant light at 22°C is greater than  
615 the delay observed at 25°C under fluctuating light (L:D) (25°C data from Hoekstra *et al.* (2013)).  
Asterisks denote a significant effect of the mtDNA x nuclear genetic interaction within each  
temperature-photoperiod combination at the level of  $P < 0.0001$  (Supplemental Table S2), with  
the associated mean days delayed of (*simw*<sup>501</sup>);*OreR* relative to (*simw*<sup>501</sup>);*Aut* and the percent  
increase in development time in parenthesis.

620

**Figure 2.** Female adult metabolic rate is robust to mito-nuclear genetic effects. A. The only  
mito-nuclear genetic effect was a small, but significant decrease in 16°C routine metabolic rate  
(RMR) in incompatible (*simw*<sup>501</sup>);*OreR* females ( $P < 0.05$ , Supplemental Table S5). B.  
Developmental reaction norms show robust thermal acclimation of female mass-corrected RMR  
625 at both measurement temperatures. C & D. Thermal reaction norms show that the  $Q_{10}$  for female  
mass-corrected RMR is similar under both developmental temperatures, and that incompatible  
(*simw*<sup>501</sup>);*OreR* females have similar metabolic plasticity as their nuclear genotypic control  
(*ore*);*OreR*. Patterns were similar for adult male metabolic rate (Supplemental Figure S2). The  
mtDNA x nuclear interaction did not affect mass-corrected RMR of males or females at either  
630 measurement temperature ( $P > 0.28$ ; Supplemental Table S6). Error bars are +/- 1 SEM.

**Figure 3.** Mito-nuclear effects on reproductive phenotypes are stronger in females. A. Male fertility was not significantly affected by the mito-nuclear incompatibility (mtDNA x nuclear:  $F_{1, 107} = 0.185$ ,  $P = 0.668$ ). B. This was in contrast to strong effects of mito-nuclear genotype on female fecundity (mtDNA x nuclear:  $F_{1, 31} = 16.976$ ,  $P = 0.0003$ ), with females of the incompatible (*simw*<sup>501</sup>);*OreR* genotype laying on average 48% the number of eggs produced by (*ore*);*OreR* females. Female fecundity data from Meiklejohn *et al.* (2013) are total eggs produced over 10 days by individual females for n = 7-10 females per genotype. Whiskers on boxplots represent interquartile ranges. Green denotes the mitochondrial-nuclear incompatible genotype, as in other figures.



Figure 1

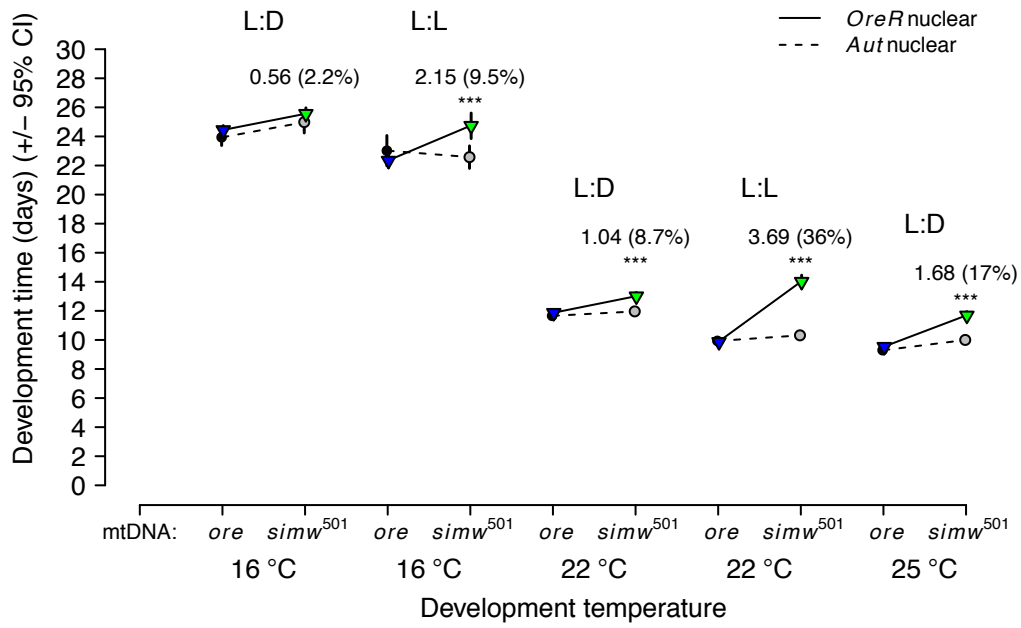

Figure 2

645

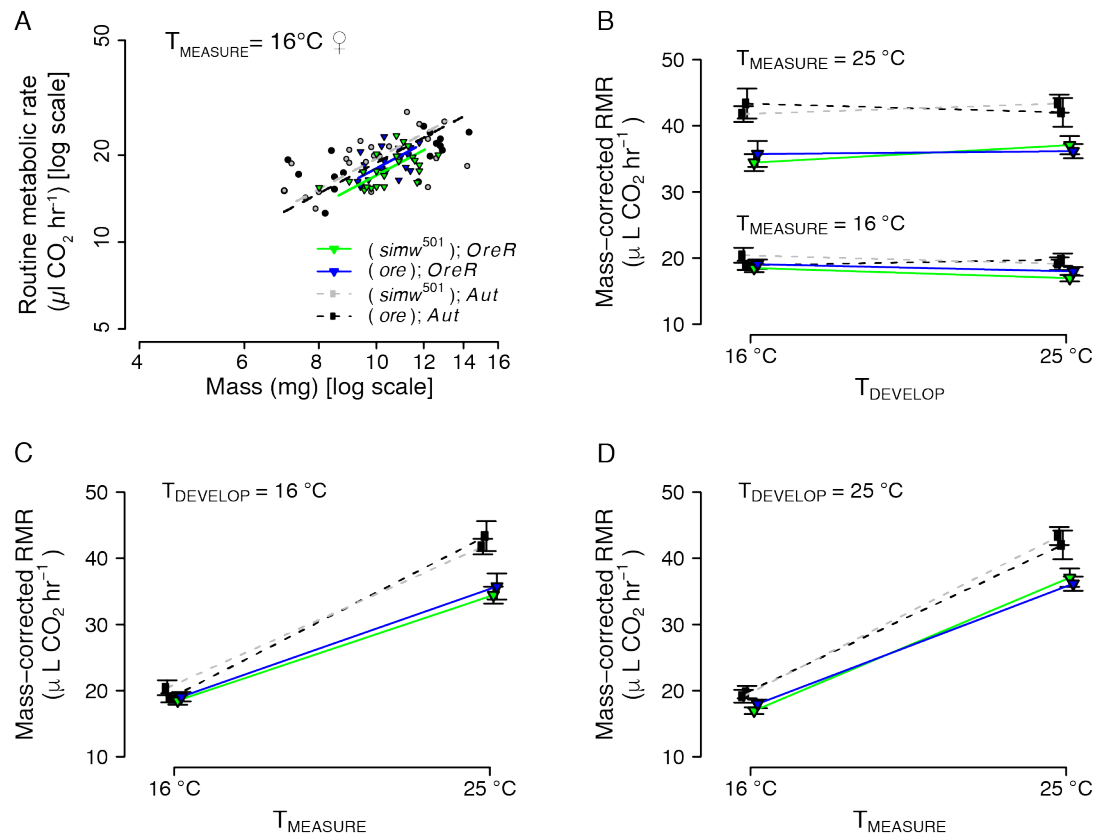

**Figure 3**

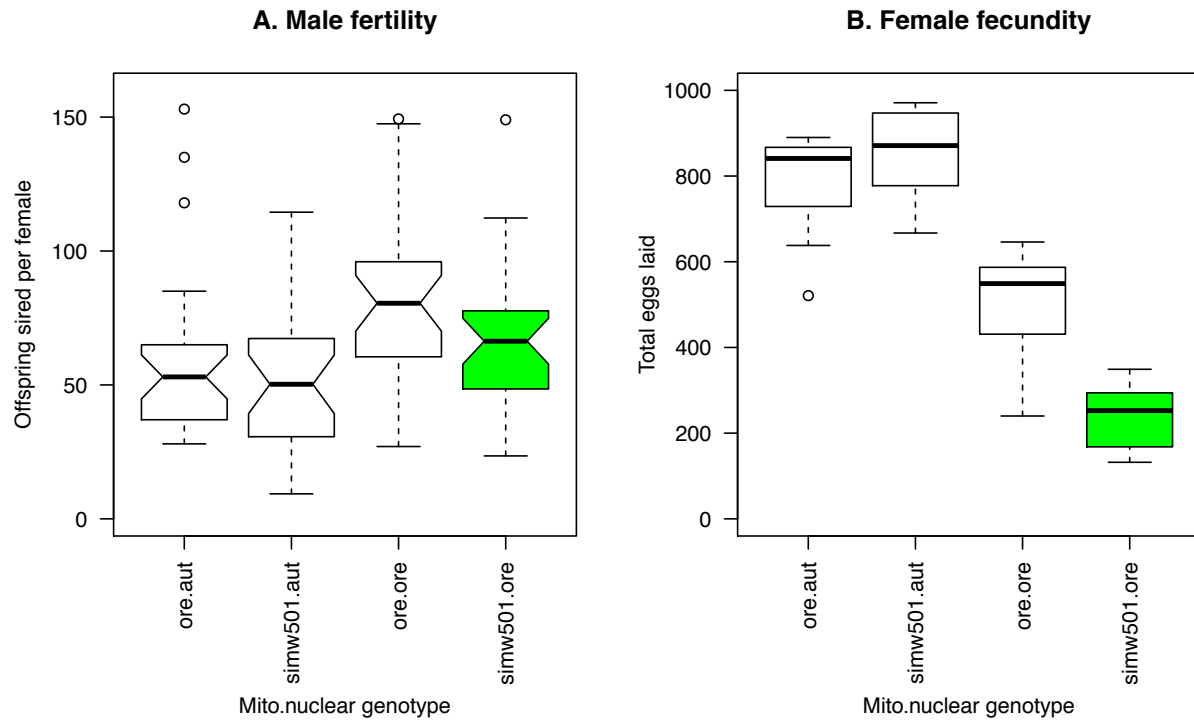

Source: https://www.biorxiv.org/content/10.1101/209510v1.full.pdf
